# Supplementary material for: Nitrogen-doped dual mesoporous carbon for the selective oxidation of ethylbenzene
Source: Royal Society of Chemistry journal article supplement (doi:10.1039/c5nr03802b), 2015-01-01
Supplement: c5nr03802b1.pdf [file c5nr03802b1.pdf]

## Supporting Information

### Nitrogen-doped dual mesoporous carbon for the selective oxidation of ethylbenzene

Aibing Chen,<sup>\*a</sup> Yifeng Yu,<sup>a</sup> Rujie Wang,<sup>a</sup> Yunhong Yu,<sup>a</sup> Wenwei Zang,<sup>a</sup> Pei Tang<sup>b</sup> and Ding Ma<sup>b</sup>

*a* College of Chemical and Pharmaceutical Engineering, Hebei University of Science and Technology, Shijiazhuang 050018, China. E-mail: chen\_ab@163.com

*b* College of Chemistry and Molecular Engineering, Peking University, Beijing 100871, China

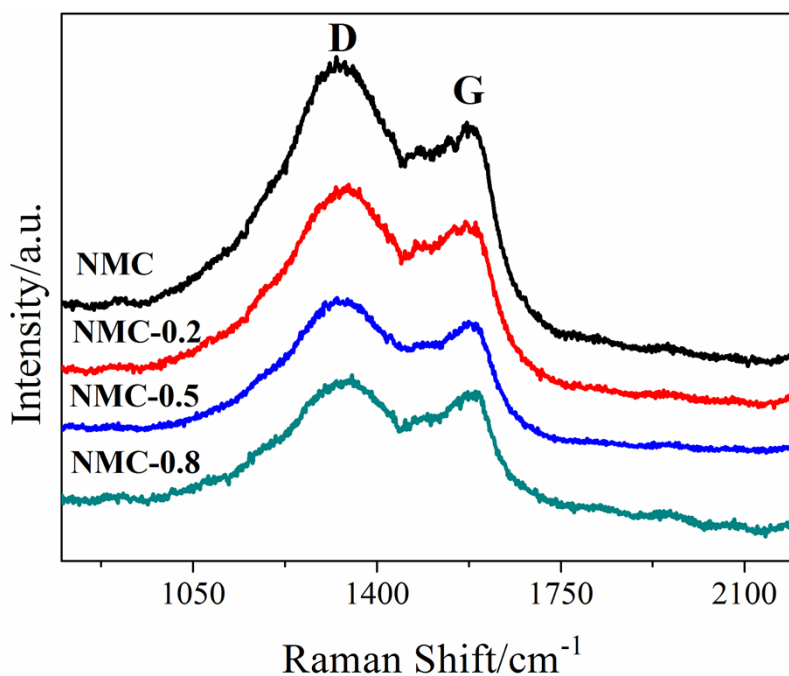

**Fig. S1** Raman spectra of the NMC-*x*.

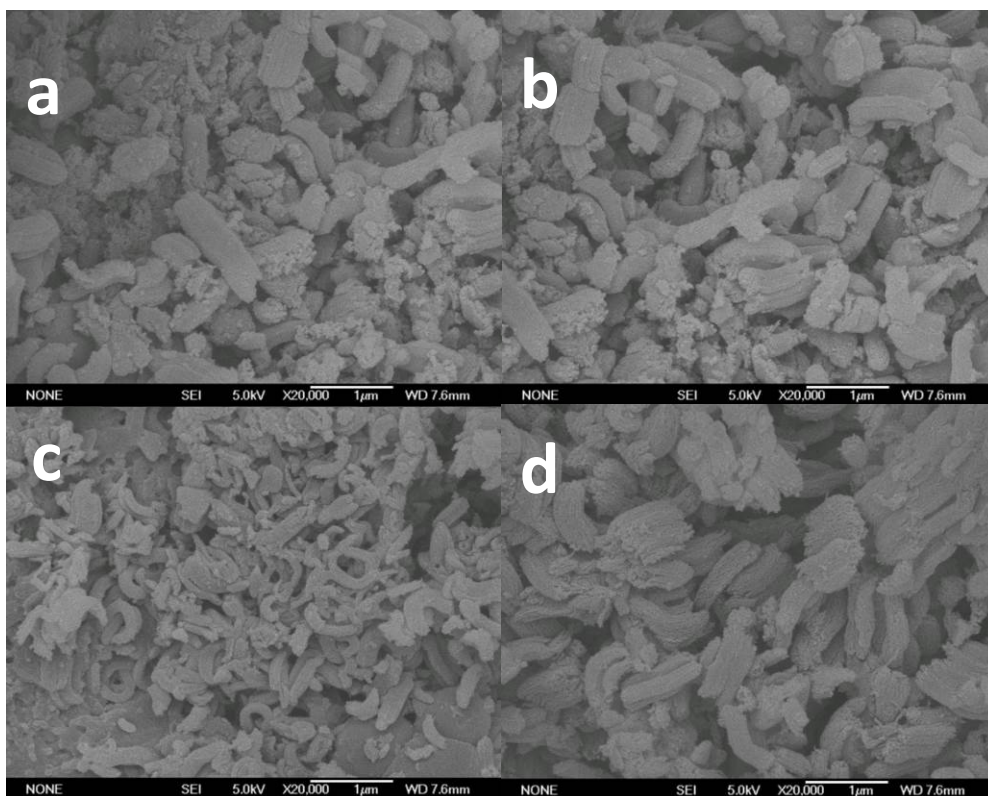

**Fig. S2** SEM images of (a) NMC (b) NMC-0.2 (c) NMC-0.5 and (d) NMC-0.8.
